1 **Centenarian Controls Increase Variant Effect-sizes by an average two-**  
2 **fold in an Extreme Case-Extreme Control Analysis of Alzheimer's**  
3 **Disease**

4  
5 Niccolò Tesi,<sup>1,2,3\*</sup> Sven J. van der Lee,<sup>1,2\*</sup> Marc Hulsman,<sup>1,2,3</sup> Iris E. Jansen,<sup>1,4</sup>  
6 Najada Stringa,<sup>5,6</sup> Natasja van Schoor,<sup>5,6</sup> Hanne Meijers-Heijboer,<sup>2</sup> Martijn Huisman,  
7 <sup>5,6</sup> Philip Scheltens,<sup>1</sup> Marcel J.T. Reinders,<sup>3</sup> Wiesje M. van der Flier <sup>1,5</sup> and Henne  
8 Holstege <sup>#1,2,3</sup>

9 \*authors contributed equally

10

11 <sup>1</sup> Alzheimer Centre, Department of Neurology, VU University Medical Centre, Amsterdam, The  
12 Netherlands

13 <sup>2</sup> Department of Clinical Genetics, VU University Medical Centre, Amsterdam, The Netherlands

14 <sup>3</sup> Delft Bioinformatics Lab, Delft University of Technology, Delft, The Netherlands

15 <sup>4</sup> Department of Complex Trait Genetics, Center for Neurogenomics and Cognitive Research, VU,  
16 Amsterdam, The Netherlands

17 <sup>5</sup> Department of Epidemiology and Biostatistics, VU University Medical Centre, Amsterdam, The  
18 Netherlands

19 <sup>6</sup> Amsterdam Public Health Research Institute, Amsterdam, The Netherlands

20

21 Keywords: cognitively healthy centenarians, extreme phenotypes, Alzheimer's disease, age-  
22 related diseases, case-control study, increased power of association

23

24 # Corresponding Author

25 Dr. Henne Holstege

26 VUmc Alzheimer's Center

27 De Boelelaan 1118

28 1081 HZ Amsterdam, The Netherlands

29 Tel: +31 20 4440816

30 Email: [h.holstege@vumc.nl](mailto:h.holstege@vumc.nl)

## 31 **Abstract**

32 The detection of genetic loci associated with Alzheimer's disease (AD) requires large  
33 numbers of cases and controls because variant effect-sizes are mostly small. We  
34 hypothesized that variant effect-sizes should increase when individuals who represent the  
35 extreme ends of a disease spectrum are considered, as their genomes are assumed to be  
36 maximally enriched or depleted with disease-associated genetic variants.

37 We used 1,073 extensively phenotyped AD cases with relatively young age at onset as  
38 extreme cases (66.3±7.9 years), 1,664 age-matched controls (66.0±6.5 years) and 255  
39 cognitively healthy centenarians as extreme controls (101.4±1.3 years). We estimated the  
40 effect-size of 29 variants that were previously associated with AD in genome-wide  
41 association studies.

42 Comparing extreme AD-cases with centenarian-controls increased the variant effect-size  
43 relative to published effect-sizes by on average 1.90-fold ( $SE=0.29$ ,  $p=9.0\times 10^{-4}$ ). The effect-  
44 size increase was largest for the rare high-impact *TREM2* (*R74H*) variant (6.5-fold), and  
45 significant for variants in/near *ECHDC3* (4.6-fold), *SLC24A4-RIN3* (4.5-fold), *NME8* (3.8-  
46 fold), *PLCG2* (3.3-fold), *APOE-ε2* (2.2-fold) and *APOE-ε4* (2.0-fold). Comparing extreme  
47 phenotypes enabled us to replicate the AD association for 10 variants ( $p<0.05$ ) in relatively  
48 small samples. The increase in effect-sizes depended mainly on using centenarians as  
49 extreme controls: the average variant effect-size was not increased in a comparison of  
50 extreme AD cases and age-matched controls (0.94-fold,  $p=6.8\times 10^{-1}$ ), suggesting that on  
51 average the tested genetic variants did not explain the extremity of the AD-cases.

52 Concluding, using centenarians as extreme controls in AD case-controls studies boosts the  
53 variant effect-size by on average two-fold, allowing the replication of disease-association in  
54 relatively small samples.

## 55 Introduction

56 Alzheimer's disease (AD) is characterized by a slow but progressive loss of cognitive  
57 functions, leading to loss of autonomy.<sup>1</sup> AD is rare at the age of 65 years, but its incidence  
58 increases exponentially to 40% at the age of 100 years.<sup>2</sup> It is currently the most prevalent  
59 cause of death at old age and one of the major health threats of the 21st century.<sup>1</sup> Better  
60 understanding of the etiological factors that determine AD is warranted as no treatment is  
61 currently available. Heritability plays an important role as genetic factors are estimated to  
62 determine 60-80% of the risk of AD.<sup>3</sup> About 30% of the genetic risk is attributable to the  $\epsilon 4$   
63 allele of *APOE* gene, and large collaborative efforts have identified over two dozen additional  
64 genetic loci that are associated with a slight modification of the risk of AD.<sup>4-17</sup> The design of  
65 these association studies relies on the comparison of very large numbers of cases with age-  
66 matched controls, such that detected associations can be attributed specifically to the  
67 disease.<sup>18</sup> However, given the prevalence of AD in the aging population, it is likely that a  
68 significant fraction of the controls will develop the disease at a later age. Therefore, as the  
69 AD risk for future cases likely involves the same genetic variants, using age-matched  
70 controls may quench variant association signals. This may, in part, explain the mostly small  
71 variant effect-sizes associated with common variants. Also, GWAS studies mostly compare  
72 common genetic variants that are widely propagated in the population; as a consequence,  
73 these have mostly small effects on AD risk.<sup>19</sup> Rare genetic variants often have larger effect-  
74 sizes than common variants, but as there are fewer carriers available in the population, the  
75 requirement for large sample sizes stands.<sup>20</sup>

76

77 Instead of increasing sample sizes of genetic studies to detect novel disease-associated  
78 genetic loci, an alternative strategy is to increase variant effect-sizes by sampling individuals  
79 with extreme phenotypes.<sup>20-22</sup> For AD and other age-related diseases, extreme cases may  
80 be defined by having a relatively early age at disease-onset, and having the phenotypic  
81 features characteristic for the disease, as defined by diagnostic assessment. Extreme

82 controls are represented by individuals who reach extreme ages without the disease.<sup>21,23,24</sup>  
83 Indeed, in a case-control study of type-2 diabetes, the effect-sizes for variants that were  
84 previously associated with the disease were increased when using centenarians as extreme  
85 controls.<sup>23</sup> The effect of using extreme phenotypes in other age-related diseases has not  
86 been studied.

87

88 Here, we explored the potential of using extreme phenotypes for genetic studies of  
89 Alzheimer's disease (AD) by investigating the change in effect-size of known AD-associated  
90 variants. Furthermore, using an age- and population-matched reference group, we  
91 investigated the contribution of each extreme phenotype.

92

## 93 **Methods**

### 94 **Cohort description**

95 As extreme AD cases group (denoted by *EA*) we used 1,149 AD cases from the Amsterdam  
96 Dementia Cohort (ADC). The ADC comprises patients who visit the memory clinic of the VU  
97 University Medical Center, The Netherlands.<sup>25,26</sup> This cohort of AD patients is extensively  
98 characterized and comprises 503 early-onset cases (denoted by *eEA*) with an age at onset  
99 <65 years, and 646 late-onset cases (denoted by *lEA*). At baseline, all subjects underwent a  
100 diagnostic assessment including neurological examination, standard laboratory tests of  
101 blood and cerebrospinal fluid, electroencephalogram and brain magnetic resonance imaging.  
102 Clinical diagnosis is made in consensus-based, multidisciplinary meetings. The diagnosis of  
103 probable AD was based on the clinical criteria formulated by the National Institute of  
104 Neurological and Communicative Disorders and Stroke - Alzheimer's Disease and Related  
105 Disorders Association (NINCDS-ADRDA) and based on National Institute of Aging -  
106 Alzheimer association (NIA-AA).<sup>25-28</sup>

107

108 As extreme control group (denoted by *EC*) we used 268 self-reported cognitively healthy  
109 centenarians from the 100-plus Study cohort.<sup>29</sup> This study includes Dutch-speaking  
110 individuals who (i) can provide official evidence for being aged 100 years or older, (ii) self-  
111 report to be cognitively healthy, which is confirmed by a proxy, (iii) consent to donation of a  
112 blood sample, (iv) consent to (at least) two home visits from a researcher, and (v) consent to  
113 undergo an interview and neuropsychological test battery.

114

115 As 'normal controls' (denoted by *NC*) we used 1,717 middle-aged (55-85 year-old)  
116 individuals from a representative sample of Dutch individuals from the Longitudinal Aging  
117 Study Amsterdam (LASA) cohort.<sup>30,31</sup> LASA is an ongoing longitudinal study of older adults  
118 initiated in 1991, with the main objective to determine predictors and consequences of aging.

119

120 The Medical Ethics Committee of the VU University Medical Center (METC) approved the  
121 ADC cohort, the LASA study and the 100-plus Study. All participants and/or their legal  
122 guardians gave written informed consent for participation in clinical and genetic studies.

123

#### 124 **Genotyping and imputation of 29 selected AD-associated genetic variants**

125 We selected 29 single nucleotide variants for which evidence for a genome-wide significant  
126 association with Alzheimer's disease was found in previous studies (*Table S1*).<sup>4-17</sup> Genetic  
127 variants were determined by standard genotyping or imputation methods. Briefly, we  
128 genotyped all individuals using the Illumina Global Screening Array  
129 (GSASharedCUSTOM\_20018389\_A2) and applied established quality control methods.<sup>32</sup>

130 We used high quality genotyping in all individuals (individual call rate >98%, variant call  
131 rate >98%), individuals with sex mismatches were excluded and HWE-departure (d-HWE)  
132 was considered significant at  $p < 1 \times 10^{-6}$ . Genotypes were prepared for imputation using  
133 provided scripts (HRC-1000G-check-bim.pl).<sup>33</sup> This script compares variant ID, strand and  
134 allele frequencies to the haplotype reference panel (HRC v1.1, April 2016).<sup>33</sup> Finally, all

135 autosomal variants were submitted to the Michigan imputation server  
136 (<https://imputationserver.sph.umich.edu>).<sup>32</sup> The server uses *SHAPEIT2* (v2.r790) to phase  
137 data and imputation to the reference panel (v1.1) was performed with *Minimac3*.<sup>32,34</sup> A total  
138 of 1,149 extreme AD cases, 1,717 normal controls and 268 extreme (centenarian) controls  
139 passed quality control. Prior to analysis, we excluded individuals of non-European ancestry  
140 ( $N_{EA} = 67$ , based on 1000Genomes<sup>35</sup> clustering) and individuals with a family relation ( $N_{EA} =$   
141  $9$ ,  $N_{EC} = 13$ ,  $N_{NC} = 53$ , identity-by-descent  $\geq 0.3$ ),<sup>36</sup> leaving 1,073 extreme AD cases ( $N_{eEA} =$   
142  $464$  and  $N_{IEA} = 609$ ), 1,664 normal controls and 255 centenarian controls for the analysis.

143

#### 144 **Statistical Analysis**

145 For each AD-associated variant, we explored the *change in effect-size* ( $E$ ) relative to  
146 reported effect-sizes when 1) comparing extreme AD cases with extreme (centenarian)  
147 controls ( $EA$  vs.  $EC$ ); 2) comparing extreme AD cases with normal controls ( $EA$  vs.  $NC$ ); and  
148 3) comparing normal AD cases with extreme (centenarian) controls ( $NA$  vs.  $EC$ ). To  
149 calculate variant effect-sizes, we used logistic regression models correcting for population  
150 stratification (principal components 1 to 6).<sup>37,38</sup> We calculated odds ratios (OR) relative to the  
151 HRC alternative allele assuming additive genetic effects, and estimated 95% confidence  
152 intervals (CIs).

153

154 We estimated the *change in effect-size* relative to reported effect sizes ( $E$ ) as follows:

$$E_{1-2}^k = \frac{\log OR_{1-2}^k}{\log OR_i^k} \quad (1)$$

155

156 where  $E_{1-2}^k$  indicates the effect-size change for variant  $k$  in a comparison of cohort 1 and  
157 cohort 2, e.g,  $E_{EA-EC}^{APOE \epsilon 4}$  indicates the effect-size change for the *APOE*  $\epsilon 4$  variant when  
158 extreme AD cases ( $EA$ ) are compared with cognitive healthy centenarians ( $EC$ ). The

159  $\log OR_{1-2}^k$  denotes the *effect-size* of variant  $k$  when comparing cohort 1 and cohort 2. The  
160 effect-size of variant  $k$  reported in literature (*Table S1*) is denoted by  $\log OR_l^k$ .

161

162 We estimated the added value of using extreme (centenarian) controls rather than ‘normal  
163 age-matched controls’ in a case-control analysis. For this, we wanted to compute the change  
164 in effect size when comparing non-extreme AD cases with extreme controls (*NA vs EC*). As  
165 we do not have direct access to ‘normal AD cases’, we estimated the effect-size for the *NA-*  
166 *EC* comparison by summing (1) the effect-size when comparing ‘normal AD cases’ and  
167 ‘normal controls’, as reported in literature ( $\log OR_l^k$ ), and (2) the effect size when comparing  
168 normal controls (*NC*) with extreme (centenarian) controls (*NC vs EC*), *i.e.*  $\log OR_{NA-EC}^k =$   
169  $\log OR_l^k + \log OR_{NC-EC}^k$ . The added value of using extreme controls in a case control analysis  
170 then becomes:

$$E_{NA-EC}^k = \frac{\log OR_l^k + \log OR_{NC-EC}^k}{\log OR_l^k} \quad (2)$$

171

172 To assess whether age at disease onset had an impact on the change in effect-size due to  
173 the extreme cases ( $E_{EA-NC}$ ), we estimated the  $\log OR_{eEA-NC}^k$  (early-onset extreme AD cases  
174 vs. normal controls) and  $\log OR_{lEA-NC}^k$  (late-onset extreme AD cases vs. normal controls),  
175 and their 95% confidence intervals. Then, we computed the probability that the effect size  
176 changes  $E_{eEA-NC}^k$  and  $E_{lEA-NC}^k$  differed using a two-samples z-test (two-tailed *p-value*).

177

### 178 **Determining significance of change in effect-size**

179 For each variant, we estimated  $E_{1-2}^k$  and a 95% confidence intervals (CI) by sampling  
180 ( $S=10,000$ ) from the  $\log OR_{1-2}^k$  and  $\log OR_l^k$  based on their respective standard errors. The  
181 probability of divergence between the distributions of the  $\log OR_{1-2}^k$  and the  $\log OR_l^k$  was  
182 determined using a two-sample z-test (two-tailed *p-value*).

183



184 The probability of observing  $E_{1-2}^k > 1$ , *i.e* an increased effect-size for variant  $k$ , is considered  
185 to be a Bernoulli variable with  $p=0.5$  (equal chance of having an increased/decreased  
186 effect). The number of variants that show an increase in effect ( $E_{1-2}^k > 1$ ) then follows a  
187 binomial distribution.

188

189 The average change in effect-size across all  $K=29$  tested variants is calculated as follows:

$$\bar{E}_{1-2} = \frac{1}{K} \sum_k^K E_{1-2}^k \quad (3)$$

190

191 Confidence intervals and probability of divergence between  $\bar{E}_{1-2}$  and previously reported  
192 effect-sizes were estimated by sampling ( $S=10,000$ , two-tailed *p-value*).

193

194 All described statistical analysis were performed with *PLINK* (v1.90b4.6) or *R* (v3.3.2).<sup>39,40</sup>

195

## 196 **Results**

197 After quality control of the genetic data, we included 1,073 extreme AD cases (with mean  
198 age at onset  $66.4 \pm 7.8$  and 52.7% females), 1,664 normal (age-matched) controls (mean age  
199 at inclusion  $66.0 \pm 6.5$ , 53.7% females), and 255 cognitive healthy centenarians as extreme  
200 controls (mean age at inclusion  $101.4 \pm 1.3$ , 74.7% females) (*Table 1*). Within the extreme AD  
201 cases group, there were 464 early-onset cases (mean age at onset  $59.1 \pm 4.1$ , 54% females),  
202 and 609 late-onset cases (mean age at onset  $72.1 \pm 4.8$ , 51% females). The age at onset of  
203 the extreme AD cases was on average 8.2 years earlier compared to previous GWA studies;  
204 the age at disease onset was on average 15.4 years earlier in early-onset cases and 2.5  
205 years earlier in late-onset cases, while the age of study inclusion of our centenarian controls  
206 was on average 29.5 years higher than for previously published controls (*Figure 1*).

207

208 **Effect of comparing extreme cases and centenarian controls**

209 In a genetic comparison of extreme AD cases and centenarian controls (*EA-EC* comparison)  
210 the average effect-size over all 29 genetic variants was 1.90-fold increased relative to the  
211 effect-sizes reported in published studies ( $\bar{E}_{EA-EC} = 1.90 \pm 0.29$ ;  $p = 9.0 \times 10^{-4}$ ) (*Figure 3*). For  
212 21 out of 29 variants, we observed an increased effect size ( $E_{EA-EC}^k > 1$ ), which is  
213 significantly more than expected by chance ( $p = 1.2 \times 10^{-2}$ ) (*Figure 2* and *Table 2*). The  
214 increase in effect-size ranged from 1.06 (variant near *CASS4*) to 6.46 (variant in *TREM2*  
215 [*R47H*]). For variants near or in the genes *TREM2* (*R47H*), *SLC24A4-RIN3* and *ECHDC3*,  
216 the increase was more than 4-fold compared to previously reported effect-sizes. For 9  
217 variants the effect-size increase was 2-4-fold (in or near the genes *NME8*, *PLGC*, *HLA-*  
218 *DRB1*, *2CD2AP*, *ZCWPW1*, *ABCA7* *APOE* [ $\epsilon 2$ ], [*A>G*], *HS3ST1* and *ABI3*, in order from  
219 high to low effect-size increases). For 9 variants the increase was between 1 and 2-fold (in  
220 or near genes, *APOE*  $\epsilon 4$ , *RPHA1*, *CELF1*, *PTK2B*, *MS4A6A*, *SORL1*, *BIN1*, *PICALM* and  
221 *CASS4*) (*Figure 2*). The effect-sizes for 6 genetic variants were not increased in our extreme  
222 phenotype analysis compared to previously reported effect-sizes ( $E_{EA-EC}^k$  between 0 and 1):  
223 in or near *TREM2* [*R62H*], *KANSL1* *CR1*, *ABCA7* [*G>C*], *CLU*, and *INPP5D*). Lastly, the  
224 effect-sizes of 2 variants were in the opposite direction compared to previously reported  
225 effects ( $E_{EA-EC}^k < 0$ ). Specifically, for the variant in *FERMT2* we found an inverted direction of  
226 effect-size and a lower magnitude of effect as compared with previous studies ( $E_{EA-EC}^{FERMT2}$   
227 between 0 and -1). For the variant near *MEF2C* we observed a larger effect-size as  
228 compared to those previously published, but in the opposite direction ( $E_{EA-EC}^{MEF2C} < -1$ ).

229  
230 Overall, for 7 variants, the effect size was significantly increased relatively to the previously  
231 reported effect-sizes (*Table 2*), in or near genes *APOE*  $\epsilon 2$  (2.2-fold,  $p = 1.4 \times 10^{-7}$ ), *APOE*  $\epsilon 4$   
232 (2.0-fold,  $p = 1.5 \times 10^{-9}$ ), *SLC24A4-RIN3* (4.5-fold,  $p = 1.6 \times 10^{-3}$ ), *ECHDC3* (4.6-fold,  $p =$   
233  $1.1 \times 10^{-2}$ ), *PLCG2* (3.3-fold  $p = 1.4 \times 10^{-2}$ ), *NME8* (3.9-fold,  $p = 1.7 \times 10^{-2}$ ) and *MEF2C* (-1.9-  
234 fold,  $p = 1.8 \times 10^{-2}$ ). Variants with significant effect-size changes, were also more likely to be  
235 associated with AD in a comparison of extreme cases and centenarians. The association

236 with AD reached nominal significance ( $p < 0.05$ ) in 10 out of 21 variants with a changed  
237 effect-size (Table 2). Next to *APOE*  $\epsilon 4$  ( $\log OR_{EA-EC}^{APOE \epsilon 4} = 2.1$ ,  $SE = 0.17$ ,  $p = 1.3 \times 10^{-33}$ ) and  
238 *APOE*  $\epsilon 2$  ( $\log OR_{EA-EC}^{APOE \epsilon 2} = -1.8$ ,  $p = 3.2 \times 10^{-21}$ ), variants in or near these genes were  
239 significantly associated with AD: *SCL24A4-RIN3*, *PLCG2*, *ECHDC3*, *NME8*, *BIN1*,  
240 *ZCWPW1*, *ABCA7* (A>G) and *HLA-DRB1* (Table 2).

241

## 242 **Effect of using extreme AD cases**

243 The average effect-size in a comparison of extreme AD cases with normal controls (*EA* vs.  
244 *NC*) did not significantly change relative to the previously reported effect-sizes ( $\bar{E}_{EA-NC} =$   
245  $0.94 \pm 0.12$ ,  $p = 6.8 \times 10^{-1}$ ) (Figure 3). For 14 individual variants, we observed an increased  
246 effect size, which was expected by chance ( $p = 0.5$ ), Figure S1 and Table S2). The effect size  
247 was significantly increased for *APOE*  $\epsilon 4$  variant (1.3-fold,  $p = 1.4 \times 10^{-5}$ ), and nominally  
248 significant for *APOE*- $\epsilon 2$  (1.4-fold,  $p = 1.7 \times 10^{-2}$ ).

249

250 We then separated AD cases into early-onset extreme AD cases ( $N_{eEA} = 464$ ) and late-onset  
251 extreme AD cases ( $N_{lEA} = 609$ ), and estimated the change in effect-sizes. When using early  
252 onset cases the average effect-size was lower relative to previously published effect sizes  
253 ( $\bar{E}_{eEA-NC}$  was  $0.86 \pm 0.16$  ( $p = 7.9 \times 10^{-1}$ ), while for late-onset cases the effect size was similar  
254 to published effect sizes ( $\bar{E}_{lEA-NC}$  was  $1.01 \pm 0.14$ ,  $p = 4.6 \times 10^{-1}$ ) (Figure S3 and Table S3).

255 We found significant differences between the effect-sizes in early-onset and late-onset AD  
256 cases ( $\log OR_{eEA-NC}^k$  and  $\log OR_{lEA-NC}^k$ , respectively) for the variants in or near *APOE*  $\epsilon 2$  (-  
257  $1.41$  vs.  $-0.89$ ;  $p = 5.0 \times 10^{-2}$ ), *ZCWPW1* ( $0.01$  vs.  $0.24$ ;  $p = 1.6 \times 10^{-2}$ ) and *MS4A6A* ( $0.12$  vs. -  
258  $0.13$ ;  $p = 7.9 \times 10^{-3}$ ).

259

## 260 **Effect of extreme controls**

261 In a comparison of normal AD cases and extreme (centenarian) controls (*NA* vs. *EC*), the  
262 effect-size was on average 1.88-fold higher relative to previously reported effect-sizes

263 ( $\bar{E}_{NA-EC} = 1.88 \pm 0.24$ ,  $p = 1.0 \times 10^{-4}$ ) (Figure 3). This was almost identical to the average  
264 increase in effect-size when we compared the extreme cases with centenarian controls  
265 ( $\bar{E}_{EA-EC} = 1.90 \pm 0.29$ ;  $p = 9.0 \times 10^{-4}$ ) (Figure 3). At the variant level, the change in effect-sizes  
266 was similar in both analyses, with the exception of the rare *TREM2* (R47H) variant, whose  
267 effect-size increase was higher in the comparison with the extreme cases (but with high  
268 confidence intervals) (Figure S4-A).

269

270 In further concordance with the comparison of the extreme phenotypes, we observed an  
271 increased effect-size for 24/29 variants relative to published variant effect-sizes ( $E_{NA-EC}^k > 1$ ),  
272 which is more than expected by chance ( $p = 2.7 \times 10^{-4}$ ) (Figure S2 and Table S2). We found a  
273 significant increase in effect-size for variants in or near *APOE-ε2* (1.7-fold,  $p < 5 \times 10^{-5}$ ),  
274 *APOE-ε4* (1.7-fold,  $p < 5 \times 10^{-5}$ ), *NME8* (4.5-fold,  $p = 3.5 \times 10^{-3}$ ), *SLC24A4-RIN3* (3.9-fold,  $p =$   
275  $4.5 \times 10^{-3}$ ) and *PLCG2* (2.9-fold,  $p = 1.9 \times 10^{-2}$ ). In line with this, for almost all variants  
276 individually, the extreme controls contributed more to the effect size change in the extremes-  
277 comparison, than the extreme cases (Figure S4-B).

278

279

## 280 Discussion

281 In this study, we found that the effect sizes of 29 variants previously identified in genetic  
282 case-control analyses for Alzheimer's Disease were increased in a case-control analysis of  
283 extreme phenotypes. The use of extreme AD-cases and cognitively healthy centenarians as  
284 extreme-controls increased effect sizes for association with AD up to 6-fold, relative to  
285 previously published effect-sizes. On average, the use of extreme phenotypes almost  
286 doubled the variant effect-size. Although changes in effect-size were different per variant,  
287 the effect-size increase was driven mainly by the centenarian controls. This profound  
288 increase enabled us to replicate the association with AD of 10 variants in relatively small  
289 samples.

290

291 In a comparison of AD cases (either normal or extreme) with centenarian controls, we  
292 observed significant effect-size increases for variants in or near *PLCG2*, *NME8*, *ECHDC3*,  
293 *SLC24A4-RIN3*, *APOE-ε2* and *APOE-ε4*. This suggests that the tested variants or loci might  
294 contribute to the long-term preservation of cognitive health and/or to longevity in general.  
295 *PLCG2* and *NME8* are implicated in immunological processes,<sup>8,43</sup> while *SLC24A4*, *ECHDC3*  
296 and *APOE* are involved in lipid and cholesterol metabolism.<sup>17,44,45</sup> Both these processes  
297 were previously associated with longevity,<sup>46,47</sup> such that an overlapping etiology of  
298 maintained cognitive health and maintained overall health may contribute to the observed  
299 increase in effect-size. However, with the exception of the *APOE* locus, these loci were thus  
300 far not associated with longevity in GWAS studies.<sup>48–51</sup> We speculate that the association  
301 might be dependent on the cognitive health in the centenarians of the 100-plus Study  
302 cohort.<sup>29</sup> Alternatively, longevity studies may have been underpowered to detect the  
303 association of these loci with extreme survival. Future studies will have to establish the  
304 mechanism behind the association of these genes with preserved cognitive health. Next to  
305 *APOE*, the *HLA-DRB1* locus has been associated with both AD<sup>13</sup> and longevity.<sup>48</sup> However,  
306 its most informative variants, *rs9271192* for AD and *rs34831921* for longevity, are not in  
307 linkage disequilibrium,<sup>52</sup> suggesting that these are independent signals.

308

309 Using extreme cases did not increase the variant effect-sizes relative to published effect-  
310 sizes, even though most of the extreme cases were biomarker confirmed and their mean  
311 age at onset was 8.2 years younger than the mean age at onset in other studies.<sup>7,8,13</sup> This  
312 suggests that based on the tested genetic variants, the “phenotypically extreme” cases  
313 presented in this study were not genetically more extreme than cases presented in other  
314 studies.

315

316 Counter intuitively, in a comparison with normal controls, the variant effect-sizes of early-  
317 onset AD cases were on average *lower* than the variant effect-size of late-onset AD cases.

318 One explanation for this observation may be that the early age at onset may have been  
319 driven by rare, high-impact variants,<sup>19</sup> while the disease onset at later ages may depend to a  
320 greater extent on more common risk variants, which are tested here. However, at the variant  
321 level, we found significant differences between the effect-sizes in early-onset and late-onset  
322 cases for variants in/near *ZCWPW1* and *APOE ε2*, and also in —opposite directions— for  
323 the variant in *MS4A6A*. These results are a first indication that these variants may  
324 differentially influence age of disease onset, however, future experiments will have to  
325 confirm this finding.

326

327 Here, we find that the majority of the observed increase in effect-size in a genetic case-  
328 control study of extreme phenotypes is attributable to the extreme controls. We note that the  
329 centenarians used in this study were selected for their preserved cognitive health, which  
330 might have further enlarged the effect-size increase for genetic variants that were previously  
331 identified for their AD-association. We acknowledge that using centenarians as controls in  
332 genetic studies of AD could result in the detection of variants associated with extreme  
333 longevity, such that newly detected AD-associations need to be verified in an age-matched  
334 AD case-control setting. Nevertheless, the effect-sizes for all but two variants are in the  
335 same direction as previously reported, which suggests that the tested AD variants do not  
336 have significant pleiotropic activities that counteract their AD-related survival effects.  
337 Notably, the two variants with an opposite effect in the comparison of the extremes relative  
338 to published effect sizes, in or near *MEF2C* and *FERMT2*, also did not associate with AD in  
339 our age-matched case-control analysis. This suggests that the AD-association of the *MEF2C*  
340 and *FERMT2* variants might be false positive findings in previous studies. This is in line with  
341 results from unpublished GWASs of AD in which AD-associations of variants near the  
342 *MEF2C* and *FERMT2* genes were not replicated<sup>41,42</sup> ( $p = 5.4 \times 10^{-3}$ ,<sup>41</sup>  $p = 3.0 \times 10^{-4}$  for  
343 *MEF2C*<sup>42</sup> and  $p = 1.6 \times 10^{-5}$  for *FERMT2*<sup>42</sup> variant, with  $5.0 \times 10^{-8}$  being the genome-wide  
344 significance threshold). An additional strength of our study is that our cohorts of AD patients  
345 and controls, were not previously used in the discovery of any of the known AD associated

346 variants;<sup>4-17</sup> we thus provide independent replication in a genetically homogeneous group of  
347 individuals, as they all came from one specific population (Dutch).

348

349 Concluding, in our comparison of cases and controls with extreme phenotypes we found that  
350 on average, the effect of AD-related variants in genetic association studies almost doubled,  
351 while at the variant level effect-sizes increased up to six-fold. The observed increment in  
352 effect-size was largely driven by the centenarians as extreme controls, identifying  
353 centenarians as a valuable resource for genetic studies, with possible applications for other  
354 age-related diseases.

355

### 356 **Acknowledgements**

357 Research of the VUmc Alzheimer center is part of the neurodegeneration research program  
358 of Amsterdam Neuroscience ([www.amsterdamresearch.org](http://www.amsterdamresearch.org)). The VUmc Alzheimer Center is  
359 supported by Stichting Alzheimer Nederland (WE09.2014-03) and Stichting VUmc fonds. The  
360 clinical database structure was developed with funding from Stichting Dioraphte (VSM 14 04  
361 14 02). The Dutch case-control study is part of EADB (European Alzheimer DNA biobank)  
362 funded by JPcofundNL (ZonMW project number: 733051061). The authors declare no  
363 conflict of interests.

364 **References**

- 365 1. (2012). 2012 Alzheimer's disease facts and figures. *Alzheimers Dement.* 8, 131–168.
- 366 2. Corrada, M.M., Brookmeyer, R., Paganini-Hill, A., Berlau, D., and Kawas, C.H. (2010).  
367 Dementia incidence continues to increase with age in the oldest old: The 90+ study. *Ann.*  
368 *Neurol.* 67, 114–121.
- 369 3. Gatz, M., Reynolds, C.A., Fratiglioni, L., Johansson, B., Mortimer, J.A., Berg, S., Fiske, A.,  
370 and Pedersen, N.L. (2006). Role of genes and environments for explaining Alzheimer  
371 disease. *Arch. Gen. Psychiatry* 63, 168–174.
- 372 4. Lambert, J.-C., Heath, S., Even, G., Campion, D., Slegers, K., Hiltunen, M., Combarros,  
373 O., Zelenika, D., Bullido, M.J., Tavernier, B., et al. (2009). Genome-wide association study  
374 identifies variants at CLU and CR1 associated with Alzheimer's disease. *Nat. Genet.* 41,  
375 1094–1099.
- 376 5. Harold, D., Abraham, R., Hollingworth, P., Sims, R., Gerrish, A., Hamshere, M.L., Pahwa,  
377 J.S., Moskvina, V., Dowzell, K., Williams, A., et al. (2009). Genome-wide association study  
378 identifies variants at CLU and PICALM associated with Alzheimer's disease. *Nat. Genet.* 41,  
379 1088–1093.
- 380 6. Seshadri, S., Fitzpatrick, A.L., Ikram, M.A., DeStefano, A.L., Gudnason, V., Boada, M.,  
381 Bis, J.C., Smith, A.V., Carassquillo, M.M., Lambert, J.C., et al. (2010). Genome-wide  
382 analysis of genetic loci associated with Alzheimer disease. *JAMA* 303, 1832–1840.
- 383 7. Desikan, R.S., Schork, A.J., Wang, Y., Thompson, W.K., Dehghan, A., Ridker, P.M.,  
384 Chasman, D.I., McEvoy, L.K., Holland, D., Chen, C.-H., et al. (2015). Polygenic Overlap  
385 Between C-Reactive Protein, Plasma Lipids, and Alzheimer Disease. *Circulation* 131, 2061–  
386 2069.
- 387 8. Sims, R., van der Lee, S.J., Naj, A.C., Bellenguez, C., Badarinarayan, N., Jakobsdottir, J.,  
388 Kunkle, B.W., Boland, A., Raybould, R., Bis, J.C., et al. (2017). Rare coding variants in  
389 PLCG2, ABI3, and TREM2 implicate microglial-mediated innate immunity in Alzheimer's  
390 disease. *Nat. Genet.* 49, 1373–1384.



- 391 9. Guerreiro, R., Wojtas, A., Bras, J., Carrasquillo, M., Rogaeva, E., Majounie, E., Cruchaga,  
392 C., Sassi, C., Kauwe, J.S.K., Younkin, S., et al. (2013). TREM2 variants in Alzheimer's  
393 disease. *N. Engl. J. Med.* 368, 117–127.
- 394 10. Jonsson, T., Stefansson, H., Steinberg, S., Jonsdottir, I., Jonsson, P.V., Snaedal, J.,  
395 Bjornsson, S., Huttenlocher, J., Levey, A.I., Lah, J.J., et al. (2013). Variant of TREM2  
396 associated with the risk of Alzheimer's disease. *N. Engl. J. Med.* 368, 107–116.
- 397 11. Hollingworth, P., Harold, D., Sims, R., Gerrish, A., Lambert, J.-C., Carrasquillo, M.M.,  
398 Abraham, R., Hamshere, M.L., Pahwa, J.S., Moskvina, V., et al. (2011). Common variants at  
399 ABCA7, MS4A6A/MS4A4E, EPHA1, CD33 and CD2AP are associated with Alzheimer's  
400 disease. *Nat. Genet.* 43, 429–435.
- 401 12. Naj, A.C., Jun, G., Beecham, G.W., Wang, L.-S., Vardarajan, B.N., Buross, J., Gallins,  
402 P.J., Buxbaum, J.D., Jarvik, G.P., Crane, P.K., et al. (2011). Common variants at  
403 MS4A4/MS4A6E, CD2AP, CD33 and EPHA1 are associated with late-onset Alzheimer's  
404 disease. *Nat. Genet.* 43, 436–441.
- 405 13. Lambert, J.C., Ibrahim-Verbaas, C.A., Harold, D., Naj, A.C., Sims, R., Bellenguez, C.,  
406 DeStafano, A.L., Bis, J.C., Beecham, G.W., Grenier-Boley, B., et al. (2013). Meta-analysis of  
407 74,046 individuals identifies 11 new susceptibility loci for Alzheimer's disease. *Nat. Genet.*  
408 45, 1452–1458.
- 409 14. Jun, G., Ibrahim-Verbaas, C.A., Vronskaya, M., Lambert, J.-C., Chung, J., Naj, A.C.,  
410 Kunkle, B.W., Wang, L.-S., Bis, J.C., Bellenguez, C., et al. (2016). A novel Alzheimer  
411 disease locus located near the gene encoding tau protein. *Mol. Psychiatry* 21, 108–117.
- 412 15. Steinberg, S., Stefansson, H., Jonsson, T., Johannsdottir, H., Ingason, A., Helgason, H.,  
413 Sulem, P., Magnusson, O.T., Gudjonsson, S.A., Unnsteinsdottir, U., et al. (2015). Loss-of-  
414 function variants in ABCA7 confer risk of Alzheimer's disease. *Nat. Genet.* 47, 445–447.
- 415 16. Strittmatter, W.J., Saunders, A.M., Schmechel, D., Pericak-Vance, M., Enghild, J.,  
416 Salvesen, G.S., and Roses, A.D. (1993). Apolipoprotein E: high-avidity binding to beta-  
417 amyloid and increased frequency of type 4 allele in late-onset familial Alzheimer disease.  
418 *Proc. Natl. Acad. Sci. U. S. A.* 90, 1977–1981.

- 419 17. Corder, E.H., Saunders, A.M., Risch, N.J., Strittmatter, W.J., Schmechel, D.E., Gaskell,  
420 P.C., Rimmler, J.B., Locke, P.A., Conneally, P.M., and Schmader, K.E. (1994). Protective  
421 effect of apolipoprotein E type 2 allele for late onset Alzheimer disease. *Nat. Genet.* 7, 180–  
422 184.
- 423 18. Rose, S., and van der Laan, M.J. (2009). Why Match? Investigating Matched Case-  
424 Control Study Designs with Causal Effect Estimation. *Int. J. Biostat.* 5,.
- 425 19. Lord, J., Lu, A.J., and Cruchaga, C. (2014). Identification of rare variants in  
426 Alzheimer’s disease. *Front. Genet.* 5,.
- 427 20. Lee, S., Abecasis, G.R., Boehnke, M., and Lin, X. (2014). Rare-variant association  
428 analysis: study designs and statistical tests. *Am. J. Hum. Genet.* 95, 5–23.
- 429 21. Li, D., Lewinger, J.P., Gauderman, W.J., Murcray, C.E., and Conti, D. (2011). Using  
430 extreme phenotype sampling to identify the rare causal variants of quantitative traits in  
431 association studies. *Genet. Epidemiol.* 35, 790–799.
- 432 22. Barnett, I.J., Lee, S., and Lin, X. (2013). Detecting rare variant effects using extreme  
433 phenotype sampling in sequencing association studies. *Genet. Epidemiol.* 37, 142–151.
- 434 23. Garagnani, P., Giuliani, C., Pirazzini, C., Olivieri, F., Bacalini, M.G., Ostan, R., Mari, D.,  
435 Passarino, G., Monti, D., Bonfigli, A.R., et al. (2013). Centenarians as super-controls to  
436 assess the biological relevance of genetic risk factors for common age-related diseases: a  
437 proof of principle on type 2 diabetes. *Aging* 5, 373–385.
- 438 24. Peloso, G.M., Rader, D.J., Gabriel, S., Kathiresan, S., Daly, M.J., and Neale, B.M.  
439 (2016). Phenotypic extremes in rare variant study designs. *Eur. J. Hum. Genet.* 24, 924–  
440 930.
- 441 25. van der Flier, W.M., Pijnenburg, Y.A.L., Prins, N., Lemstra, A.W., Bouwman, F.H.,  
442 Teunissen, C.E., van Berckel, B.N.M., Stam, C.J., Barkhof, F., Visser, P.J., et al. (2014).  
443 Optimizing patient care and research: the Amsterdam Dementia Cohort. *J. Alzheimers Dis.*  
444 *JAD* 41, 313–327.
- 445 26. van der Flier, W.M., and Scheltens, P. (2018). Amsterdam Dementia Cohort: Performing  
446 Research to Optimize Care. *J. Alzheimers Dis.* 62, 1091–1111.

- 447 27. Varma, A.R., Snowden, J.S., Lloyd, J.J., Talbot, P.R., Mann, D.M., and Neary, D. (1999).  
448 Evaluation of the NINCDS-ADRDA criteria in the differentiation of Alzheimer's disease and  
449 frontotemporal dementia. *J. Neurol. Neurosurg. Psychiatry* 66, 184–188.
- 450 28. Blacker, D., Albert, M.S., Bassett, S.S., Go, R.C., Harrell, L.E., and Folstein, M.F. (1994).  
451 Reliability and validity of NINCDS-ADRDA criteria for Alzheimer's disease. The National  
452 Institute of Mental Health Genetics Initiative. *Arch. Neurol.* 51, 1198–1204.
- 453 29. Holstege, H., Beker, N., Dijkstra, T., Pieterse, K., Wemmenhove, E., Schouten, K.,  
454 Thiessens, L., Horsten, D., Rechtuijt, S., Sikkes, S., et al. (2018). The 100-plus Study of  
455 Dutch cognitively healthy centenarians: rationale, design and cohort description.
- 456 30. Huisman, M., Poppelaars, J., van der Horst, M., Beekman, A.T., Brug, J., van Tilburg,  
457 T.G., and Deeg, D.J. (2011). Cohort Profile: The Longitudinal Aging Study Amsterdam. *Int. J.*  
458 *Epidemiol.* 40, 868–876.
- 459 31. Hoogendijk, E.O., Deeg, D.J.H., Poppelaars, J., van der Horst, M., Broese van Groenou,  
460 M.I., Comijs, H.C., Pasman, H.R.W., van Schoor, N.M., Suanet, B., Thomése, F., et al.  
461 (2016). The Longitudinal Aging Study Amsterdam: cohort update 2016 and major findings.  
462 *Eur. J. Epidemiol.* 31, 927–945.
- 463 32. Das, S., Forer, L., Schönherr, S., Sidore, C., Locke, A.E., Kwong, A., Vrieze, S.I., Chew,  
464 E.Y., Levy, S., McGue, M., et al. (2016). Next-generation genotype imputation service and  
465 methods. *Nat. Genet.* 48, 1284–1287.
- 466 33. McCarthy, S., Das, S., Kretzschmar, W., Delaneau, O., Wood, A.R., Teumer, A., Kang,  
467 H.M., Fuchsberger, C., Danecek, P., Sharp, K., et al. (2016). A reference panel of 64,976  
468 haplotypes for genotype imputation. *Nat. Genet.* 48, 1279–1283.
- 469 34. O'Connell, J., Gurdasani, D., Delaneau, O., Pirastu, N., Ulivi, S., Cocca, M., Traglia, M.,  
470 Huang, J., Huffman, J.E., Rudan, I., et al. (2014). A general approach for haplotype phasing  
471 across the full spectrum of relatedness. *PLoS Genet.* 10, e1004234.
- 472 35. 1000 Genomes Project Consortium, Auton, A., Brooks, L.D., Durbin, R.M., Garrison,  
473 E.P., Kang, H.M., Korbel, J.O., Marchini, J.L., McCarthy, S., McVean, G.A., et al. (2015). A  
474 global reference for human genetic variation. *Nature* 526, 68–74.

- 475 36. Anderson, C.A., Pettersson, F.H., Clarke, G.M., Cardon, L.R., Morris, A.P., and  
476 Zondervan, K.T. (2010). Data quality control in genetic case-control association studies. *Nat.*  
477 *Protoc.* 5, 1564–1573.
- 478 37. Price, A.L., Zaitlen, N.A., Reich, D., and Patterson, N. (2010). New approaches to  
479 population stratification in genome-wide association studies. *Nat. Rev. Genet.* 11, 459–463.
- 480 38. Price, A.L., Patterson, N.J., Plenge, R.M., Weinblatt, M.E., Shadick, N.A., and Reich, D.  
481 (2006). Principal components analysis corrects for stratification in genome-wide association  
482 studies. *Nat. Genet.* 38, 904–909.
- 483 39. Purcell, S., Neale, B., Todd-Brown, K., Thomas, L., Ferreira, M.A.R., Bender, D., Maller,  
484 J., Sklar, P., de Bakker, P.I.W., Daly, M.J., et al. (2007). PLINK: a tool set for whole-genome  
485 association and population-based linkage analyses. *Am. J. Hum. Genet.* 81, 559–575.
- 486 40. R Core Team R: A language and environment for statistical computing. *R Foundation for*  
487 *Statistical Computing, Vienna, Austria.*
- 488 41. Marioni, R., Harris, S.E., McRae, A.F., Zhang, Q., Hagenaars, S.P., Hill, W.D., Davies,  
489 G., Ritchie, C.W., Gale, C., Starr, J.M., et al. (2018). GWAS on family history of Alzheimer’s  
490 disease.
- 491 42. Jansen, I., Savage, J., Watanabe, K., Bryois, J., Williams, D., Steinberg, S., Sealock, J.,  
492 Karlsson, I., Hagg, S., Athanasiu, L., et al. (2018). Genetic meta-analysis identifies 9 novel  
493 loci and functional pathways for Alzheimers disease risk.
- 494 43. Van Cauwenberghe, C., Van Broeckhoven, C., and Sleegers, K. (2016). The genetic  
495 landscape of Alzheimer disease: clinical implications and perspectives. *Genet. Med.* 18,  
496 421–430.
- 497 44. Saunders, A.M., Strittmatter, W.J., Schmechel, D., George-Hyslop, P.H., Pericak-Vance,  
498 M.A., Joo, S.H., Rosi, B.L., Gusella, J.F., Crapper-MacLachlan, D.R., and Alberts, M.J.  
499 (1993). Association of apolipoprotein E allele epsilon 4 with late-onset familial and sporadic  
500 Alzheimer’s disease. *Neurology* 43, 1467–1472.
- 501 45. Kraja, A.T., Borecki, I.B., Tsai, M.Y., Ordovas, J.M., Hopkins, P.N., Lai, C.-Q., Frazier-  
502 Wood, A.C., Straka, R.J., Hixson, J.E., Province, M.A., et al. (2013). Genetic analysis of 16

- 503 NMR-lipoprotein fractions in humans, the GOLDN study. *Lipids* 48, 155–165.
- 504 46. Brooks-Wilson, A.R. (2013). Genetics of healthy aging and longevity. *Hum. Genet.* 132,  
505 1323–1338.
- 506 47. vB Hjelmborg, J., Iachine, I., Skytthe, A., Vaupel, J.W., McGue, M., Koskenvuo, M.,  
507 Kaprio, J., Pedersen, N.L., and Christensen, K. (2006). Genetic influence on human lifespan  
508 and longevity. *Hum. Genet.* 119, 312–321.
- 509 48. Joshi, P.K., Pirastu, N., Kentistou, K.A., Fischer, K., Hofer, E., Schraut, K.E., Clark,  
510 D.W., Nutile, T., Barnes, C.L.K., Timmers, P.R.H.J., et al. (2017). Genome-wide meta-  
511 analysis associates HLA-DQA1/DRB1 and LPA and lifestyle factors with human longevity.  
512 *Nat. Commun.* 8,.
- 513 49. Ryu, S., Atzmon, G., Barzilai, N., Raghavachari, N., and Suh, Y. (2016). Genetic  
514 landscape of APOE in human longevity revealed by high-throughput sequencing. *Mech.*  
515 *Ageing Dev.* 155, 7–9.
- 516 50. Broer, L., Buchman, A.S., Deelen, J., Evans, D.S., Faul, J.D., Lunetta, K.L., Sebastiani,  
517 P., Smith, J.A., Smith, A.V., Tanaka, T., et al. (2015). GWAS of longevity in CHARGE  
518 consortium confirms APOE and FOXO3 candidacy. *J. Gerontol. A. Biol. Sci. Med. Sci.* 70,  
519 110–118.
- 520 51. Sebastiani, P., Gurinovich, A., Bae, H., Andersen, S., Malovini, A., Atzmon, G., Villa, F.,  
521 Kraja, A.T., Ben-Avraham, D., Barzilai, N., et al. (2017). Four Genome-Wide Association  
522 Studies Identify New Extreme Longevity Variants. *J. Gerontol. Ser. A* 72, 1453–1464.
- 523 52. Ward, L.D., and Kellis, M. (2012). HaploReg: a resource for exploring chromatin states,  
524 conservation, and regulatory motif alterations within sets of genetically linked variants.  
525 *Nucleic Acids Res.* 40, D930–D934.
- 526

527 **Tables and Figures**

528

529 **Table 1: Population characteristics**

|                                         | <b>Extreme AD Cases (EA)</b> | <b>Centenarian controls (EC)</b> | <b>Normal controls (NC)</b> |
|-----------------------------------------|------------------------------|----------------------------------|-----------------------------|
| <b>Number of individuals</b>            | 1,073                        | 255                              | 1,664                       |
| <b>Females (%)</b>                      | 564 (52.6)                   | 191 (74.9)                       | 893 (53.7)                  |
| <b>Age (SD)*</b>                        | 66.4 (7.8)                   | 101.4 (1.3)                      | 66.0 (6.5)                  |
| <b>ApoE <math>\epsilon 4</math> (%)</b> | 981 (42.7)                   | 44 (8.6)                         | 533 (16.0)                  |
| <b>ApoE <math>\epsilon 2</math> (%)</b> | 76 (3.5)                     | 78 (15.3)                        | 304 (9.1)                   |

530 \*Age at onset for extreme Alzheimer's disease cases, age at study inclusion for extreme controls and normal  
531 controls; Abbreviations: SD, standard deviation; ApoE, Apolipoprotein E allele count for  $\epsilon 4$  and  $\epsilon 2$ , respectively;  
532 Reference to the cohorts reported in this table are: <sup>25,26,29,30</sup>

**Table 2:** Association statistics of the 29 tested AD-associated variants

| Chr       | Position          | Rs ID             | Gene                                 | A1       | $\log OR_l^k$<br>(SE) | $\log OR_{EA-EC}^k$<br>(SE) | $P\text{-value}_{EA-EC}$                   | $E_{EA-EC}^k$<br>(95% CI, p)                                 | $AF_{EA}$    | $AF_{NC}$    | $AF_{EC}$    |
|-----------|-------------------|-------------------|--------------------------------------|----------|-----------------------|-----------------------------|--------------------------------------------|--------------------------------------------------------------|--------------|--------------|--------------|
| 6         | 41,129,252        | rs75932628        | TREM2 (R47H)                         | T        | 0.89 (0.09)           | 5.75 (5.13)                 | $2.63 \times 10^{-1}$                      | 6.46 (-4.83 - 18.46, $3.5 \times 10^{-1}$ )                  | 0.003        | 0.001        | 0.000        |
| <b>10</b> | <b>11,720,308</b> | <b>rs7920721</b>  | <b>ECHDC3</b>                        | <b>G</b> | <b>0.07 (0.01)</b>    | <b>0.31 (0.10)</b>          | <b><math>2.93 \times 10^{-3} *</math></b>  | <b>4.56 (1.55 - 8.93, <math>1.8 \times 10^{-2}</math>)</b>   | <b>0.430</b> | <b>0.389</b> | <b>0.357</b> |
| <b>14</b> | <b>92,926,952</b> | <b>rs10498633</b> | <b>SLC24A4-RIN3</b>                  | <b>T</b> | <b>-0.09 (0.01)</b>   | <b>-0.42 (0.11)</b>         | <b><math>1.30 \times 10^{-4} *</math></b>  | <b>4.50 (2.08 - 7.93, <math>2.8 \times 10^{-3}</math>)</b>   | <b>0.206</b> | <b>0.236</b> | <b>0.292</b> |
| <b>7</b>  | <b>37,841,534</b> | <b>rs2718058</b>  | <b>NME8</b>                          | <b>G</b> | <b>-0.08 (0.01)</b>   | <b>-0.29 (0.10)</b>         | <b><math>3.72 \times 10^{-3} *</math></b>  | <b>3.80 (1.17 - 7.28, <math>3.3 \times 10^{-2}</math>)</b>   | <b>0.360</b> | <b>0.367</b> | <b>0.433</b> |
| <b>16</b> | <b>81,942,028</b> | <b>rs72824905</b> | <b>PLCG2</b>                         | <b>G</b> | <b>-0.39 (0.06)</b>   | <b>-1.27 (0.40)</b>         | <b><math>1.38 \times 10^{-3} *</math></b>  | <b>3.28 (1.26 - 5.98, <math>2.8 \times 10^{-2}</math>)</b>   | <b>0.008</b> | <b>0.012</b> | <b>0.025</b> |
| 6         | 32,578,530        | rs9271192         | HLA-DRB1                             | A        | -0.11 (0.01)          | -0.35 (0.16)                | $3.06 \times 10^{-2} *$                    | 3.20 (0.35 - 6.65, $1.3 \times 10^{-1}$ )                    | 0.712        | 0.727        | 0.780        |
| 7         | 100,004,446       | rs1476679         | ZCWPW1                               | T        | 0.09 (0.01)           | 0.26 (0.11)                 | $1.34 \times 10^{-2} *$                    | 2.97 (0.60 - 6.10, $1.0 \times 10^{-1}$ )                    | 0.703        | 0.674        | 0.649        |
| 19        | 1,063,443         | rs4147929         | ABCA7 (A>G)                          | G        | -0.14 (0.02)          | -0.32 (0.14)                | $2.11 \times 10^{-2} *$                    | 2.26 (0.30 - 4.42, $2.2 \times 10^{-1}$ )                    | 0.809        | 0.834        | 0.855        |
| <b>19</b> | <b>45,412,079</b> | <b>rs7412</b>     | <b>APOE (<math>\epsilon</math>2)</b> | <b>T</b> | <b>-0.79 (0.03)</b>   | <b>-1.76 (0.18)</b>         | <b><math>3.16 \times 10^{-21} *</math></b> | <b>2.24 (1.75 - 2.77, <math>1.4 \times 10^{-7}</math>)</b>   | <b>0.033</b> | <b>0.091</b> | <b>0.149</b> |
| 4         | 11,711,232        | rs13113697        | HS3ST1                               | G        | -0.07 (0.01)          | -0.14 (0.12)                | $2.41 \times 10^{-1}$                      | 2.06 (-1.49 - 6.13, $5.4 \times 10^{-1}$ )                   | 0.265        | 0.268        | 0.247        |
| 17        | 47,297,297        | rs616338          | ABI3                                 | C        | -0.36 (0.05)          | -0.74 (0.57)                | $1.93 \times 10^{-1}$                      | 2.06 (-0.99 - 5.59, $5.2 \times 10^{-1}$ )                   | 0.017        | 0.009        | 0.006        |
| 6         | 47,487,762        | rs10948363        | CD2AP                                | G        | 0.10 (0.01)           | 0.19 (0.11)                 | $8.84 \times 10^{-2}$                      | 2.00 (-0.34 - 4.60, $4.1 \times 10^{-1}$ )                   | 0.284        | 0.272        | 0.245        |
| <b>19</b> | <b>45,411,941</b> | <b>rs429358</b>   | <b>APOE (<math>\epsilon</math>4)</b> | <b>C</b> | <b>1.05 (0.03)</b>    | <b>2.08 (0.17)</b>          | <b><math>1.31 \times 10^{-33} *</math></b> | <b>1.99 (1.65 - 2.33, <math>1.5 \times 10^{-9}</math>)</b>   | <b>0.429</b> | <b>0.166</b> | <b>0.082</b> |
| 7         | 143,110,762       | rs11771145        | EPHA1                                | A        | -0.10 (0.01)          | -0.20 (0.10)                | $5.96 \times 10^{-2}$                      | 1.94 (-0.09 - 4.29, $3.7 \times 10^{-1}$ )                   | 0.325        | 0.345        | 0.371        |
| 11        | 47,557,871        | rs10838725        | CELF1                                | C        | 0.08 (0.01)           | 0.14 (0.11)                 | $2.05 \times 10^{-1}$                      | 1.78 (-0.95 - 5.11, $5.8 \times 10^{-1}$ )                   | 0.328        | 0.314        | 0.302        |
| 8         | 27,195,121        | rs28834970        | PTK2B                                | C        | 0.10 (0.01)           | 0.18 (0.10)                 | $8.96 \times 10^{-2}$                      | 1.76 (-0.23 - 4.09, $4.7 \times 10^{-1}$ )                   | 0.395        | 0.376        | 0.353        |
| 11        | 59,923,508        | rs983392          | MS4A6A                               | G        | -0.11 (0.01)          | -0.17 (0.10)                | $9.39 \times 10^{-2}$                      | 1.56 (-0.20 - 3.61, $5.4 \times 10^{-1}$ )                   | 0.397        | 0.403        | 0.439        |
| 11        | 121,435,587       | rs11218343        | SORL1                                | C        | -0.26 (0.03)          | -0.39 (0.25)                | $1.21 \times 10^{-1}$                      | 1.48 (-0.39 - 3.51, $6.2 \times 10^{-1}$ )                   | 0.033        | 0.040        | 0.047        |
| 2         | 127,892,810       | rs6733839         | BIN1                                 | T        | 0.20 (0.01)           | 0.25 (0.10)                 | $1.12 \times 10^{-2} *$                    | 1.28 (0.31 - 2.29, $5.8 \times 10^{-1}$ )                    | 0.456        | 0.413        | 0.390        |
| 11        | 85,867,875        | rs10792832        | PICALM                               | G        | 0.14 (0.01)           | 0.15 (0.10)                 | $1.26 \times 10^{-1}$                      | 1.09 (-0.30 - 2.56, $9.1 \times 10^{-1}$ )                   | 0.653        | 0.614        | 0.612        |
| 20        | 55,018,260        | rs7274581         | CASS4                                | C        | -0.13 (0.02)          | -0.14 (0.18)                | $4.41 \times 10^{-1}$                      | 1.06 (-1.83 - 4.07, $9.7 \times 10^{-1}$ )                   | 0.075        | 0.088        | 0.084        |
| 6         | 41,129,207        | rs143332484       | TREM2 (R62H)                         | T        | 0.50 (0.07)           | 0.48 (0.48)                 | $3.21 \times 10^{-1}$                      | 0.97 (-0.96 - 3.09, $9.8 \times 10^{-1}$ )                   | 0.017        | 0.015        | 0.009        |
| 17        | 44,353,222        | rs118172952       | KANSL1                               | G        | -0.14 (0.03)          | -0.13 (0.14)                | $3.44 \times 10^{-1}$                      | 0.97 (-1.08 - 3.64, $9.6 \times 10^{-1}$ )                   | 0.191        | 0.202        | 0.221        |
| 1         | 207,692,049       | rs6656401         | CR1                                  | G        | -0.17 (0.01)          | -0.12 (0.12)                | $3.11 \times 10^{-1}$                      | 0.75 (-0.75 - 2.21, $7.4 \times 10^{-1}$ )                   | 0.781        | 0.803        | 0.806        |
| 19        | 1,061,892         | rs200538373       | ABCA7 (G>C)                          | C        | -0.65 (0.14)          | -0.44 (0.80)                | $5.81 \times 10^{-1}$                      | 0.68 (-1.83 - 3.54, $7.9 \times 10^{-1}$ )                   | 0.004        | 0.004        | 0.006        |
| 8         | 27,467,686        | rs9331896         | CLU                                  | T        | 0.15 (0.01)           | 0.09 (0.10)                 | $3.99 \times 10^{-1}$                      | 0.60 (-0.78 - 2.06, $5.8 \times 10^{-1}$ )                   | 0.361        | 0.400        | 0.378        |
| 2         | 234,068,476       | rs35349669        | INPP5D                               | T        | 0.08 (0.01)           | 0.03 (0.10)                 | $7.83 \times 10^{-1}$                      | 0.36 (-2.33 - 3.16, $6.2 \times 10^{-1}$ )                   | 0.474        | 0.496        | 0.486        |
| 14        | 53,400,629        | rs17125944        | FERMT2                               | C        | 0.13 (0.02)           | -0.11 (0.16)                | $4.99 \times 10^{-1}$                      | -0.82 (-3.46 - 1.60, $1.3 \times 10^{-1}$ )                  | 0.104        | 0.105        | 0.114        |
| <b>5</b>  | <b>88,223,420</b> | <b>rs190982</b>   | <b>MEF2C</b>                         | <b>A</b> | <b>0.08 (0.01)</b>    | <b>-0.14 (0.10)</b>         | <b><math>1.70 \times 10^{-1}</math></b>    | <b>-1.86 (-5.01 - 0.77, <math>3.3 \times 10^{-2}</math>)</b> | <b>0.408</b> | <b>0.406</b> | <b>0.372</b> |
| AVERAGE   |                   |                   |                                      |          |                       |                             |                                            | $1.90 \pm 0.29, p = 9.0 \times 10^{-4}$                      |              |              |              |

534 Abbreviations: *Chr*, chromosome; *Position*, chromosomal position; *Rs ID*, variant ID; *Gene*, gene associated with the variant according to paper in which the variant was found;  
535 *A1*, allele tested;  $\log OR_l^k (SE)$ , log(odds ratio) and relative standard error for variant *k* reported by study with largest sample size;  $\log OR_{EA-EC}^k (SE)$ , log(odds ratio) and relative  
536 standard error in extreme-control association; *P-value*, *p*-value of AD-association of extreme AD cases vs. centenarian controls;  $E_{EA-EC}^k (95\% CI, p)$ , change in effect-size, 95%  
537 confidence intervals and *p*-value of difference when using extreme phenotypes relative to published effect-sizes;  $AF_{EA}$ , tested allele frequency in AD extreme cases;  $AF_{NC}$ ,  
538 tested allele frequency in normal controls;  $AF_{EC}$ , tested allele frequency in centenarian controls. Bold: variants for which the  $E_{EA-EC}^k$  was significantly different from published  
539 effect-size; Stars\*: significant at  $p < 0.05$ .  
540



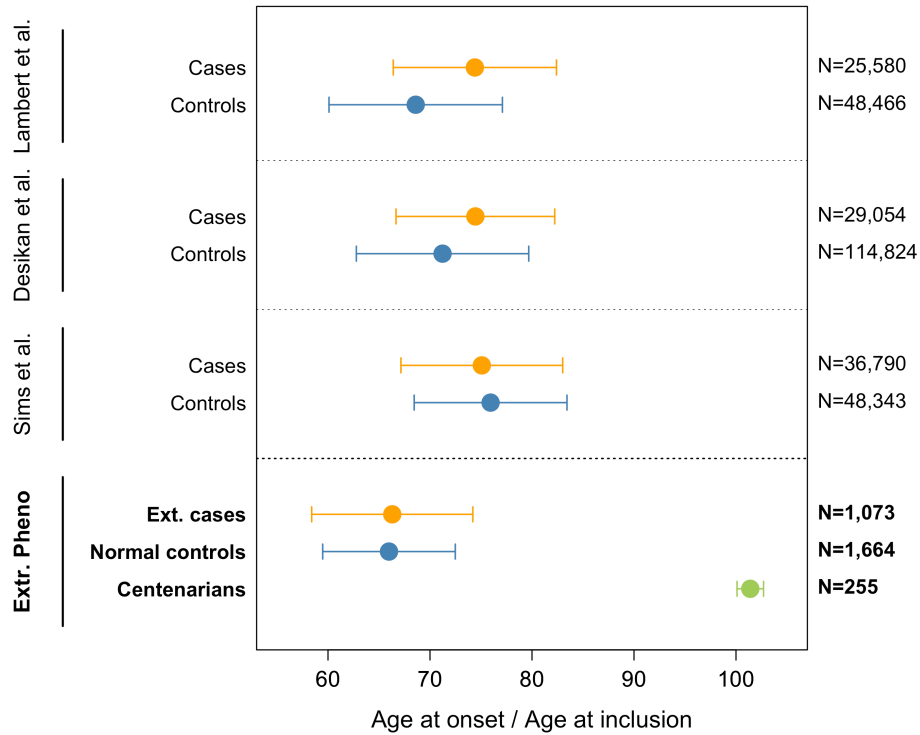

541

542 **Figure 1: Comparison of age at disease-onset and age at inclusion for cases and controls in**  
543 **previously reported case-control comparisons, and in our extreme phenotypes comparison.**

544 Weighted mean and (combined) standard deviation of the age at onset for AD cases and age at  
545 inclusion for controls. As weights, we used the sample sizes of each GWA study. Note that previous  
546 case-control studies of AD included samples from multiple cohorts, sometimes overlapping across  
547 studies. References to the cohorts reported in this figure are: <sup>7,8,13,25,26,30</sup>

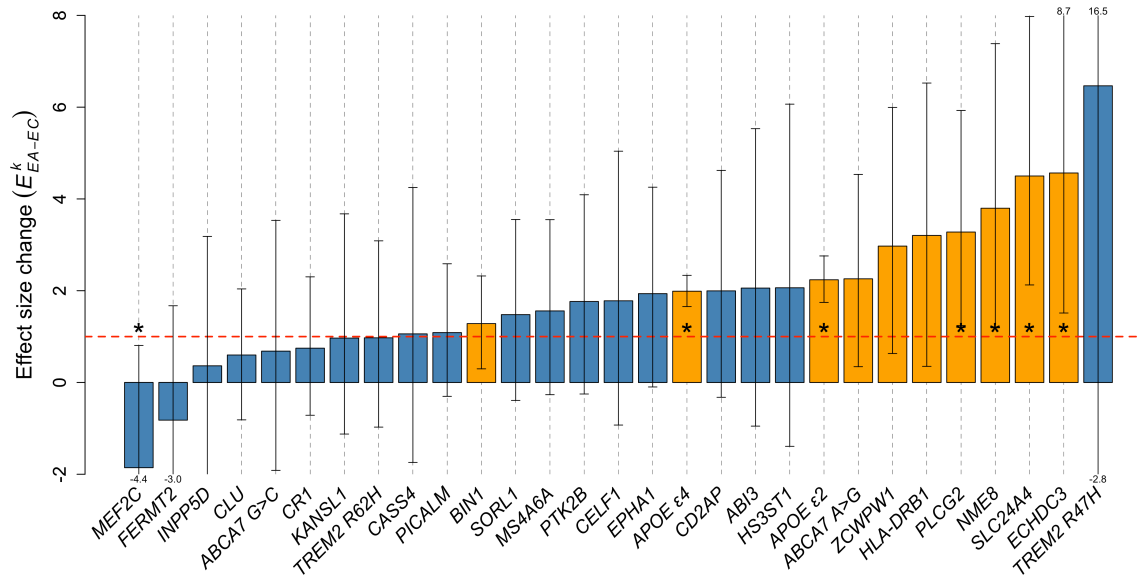

548  
549  
550  
551  
552  
553  
554

**Figure 2: Change in variant effect-size using extreme cases and centenarian controls relative to published effect-sizes, for 29 AD associated genetic variants.** Dashed red line at  $E^k_{EA-EC}=1$  indicates same effect-size as reported in literature. Orange bars indicate nominal statistical significance for the association with AD ( $p < 0.05$ ). Stars indicate significant changes of effect-size relative to previously reported effect-sizes ( $p < 0.05$ , two-sample z-test).

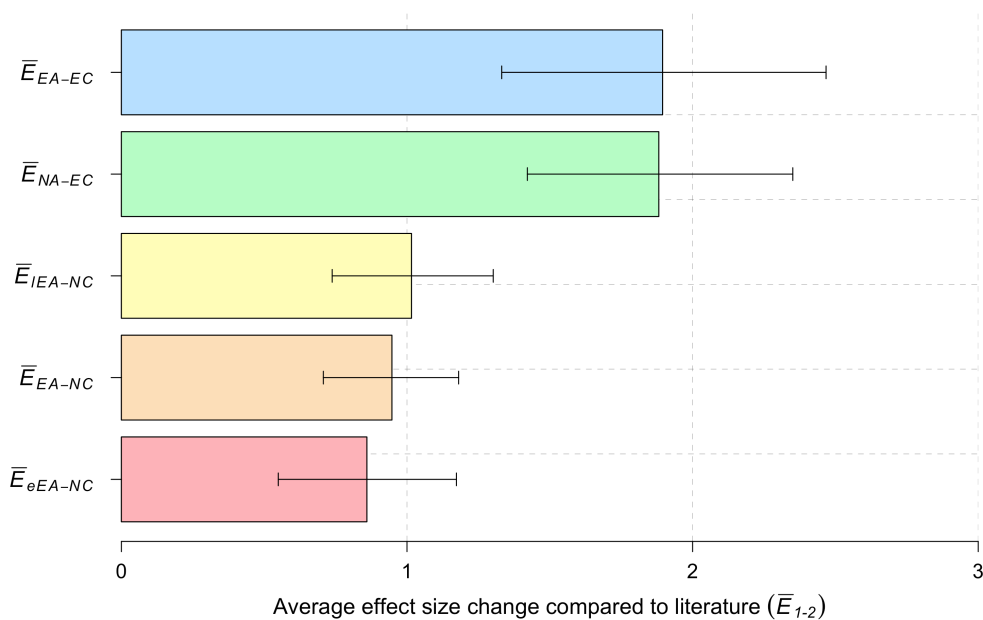

555  
556  
557  
558  
559

**Figure 3: Average increase in effect-size for the different comparisons.** Average increase in effect sizes for: Extreme AD cases ( $N_{EA}=1,073$ ), of which early onset cases ( $N_{eEA}=464$ ) late onset cases ( $N_{IEA}=609$ ); centenarian controls ( $N_{EC}=255$ ); normal controls ( $N_{NC}=1,664$ ). 95% confidence intervals were estimated by random sampling ( $S=10,000$ ).
